# Supplementary material for: Color tunable emission from Eu3+ and Tm3+ co-doped CsPbBr3 quantum dot glass nanocomposites
Source: Royal Society of Chemistry journal article supplement (doi:10.1039/d1cp05016h), 2021-12-06
Supplement: d1cp05016h1.pdf [file d1cp05016h1.pdf]

## Supporting Information

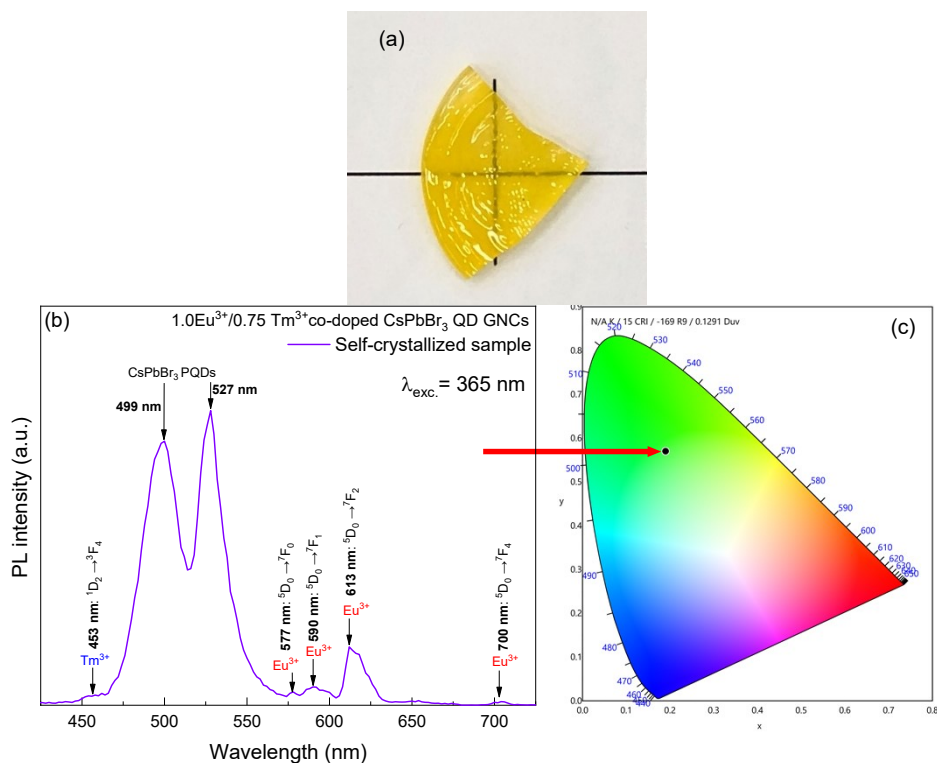

**Fig. S1.** Undesired self-crystallization of CsPbBr<sub>3</sub> QDs in glass matrix occurs when the ratio of Eu<sup>3+</sup> and Tm<sup>3+</sup> is selected as 1 and 0.75 mol%, respectively. (a) Digital images of self-crystallized sample under ambient light without surface preparation. (b) PL spectra and (c) the corresponding CIE color chromaticity diagram.

**Note:** The self-crystallized sample appears opaque and emits greenish light when excited under 365 nm light.

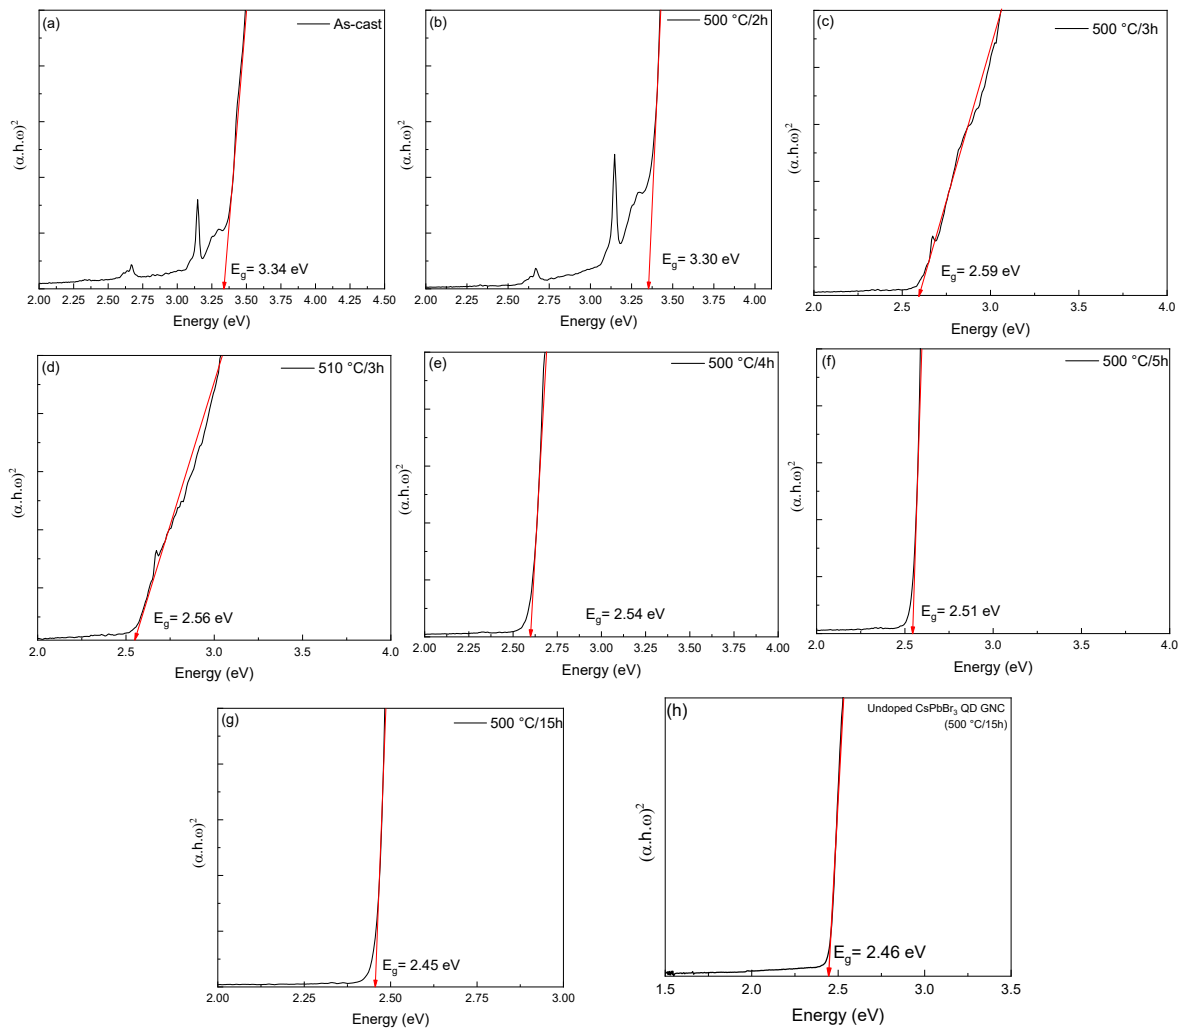

**Fig. S2.** Tauc plots of (a) as-cast sample, and (b) 500 °C/2h, (c) 500 °C/3h, (d) 510 °C/3h, (e) 500 °C/4h, (f) 500 °C/5h, (g) 500 °C/15h and (h) un-doped (500 °C/15h) samples.

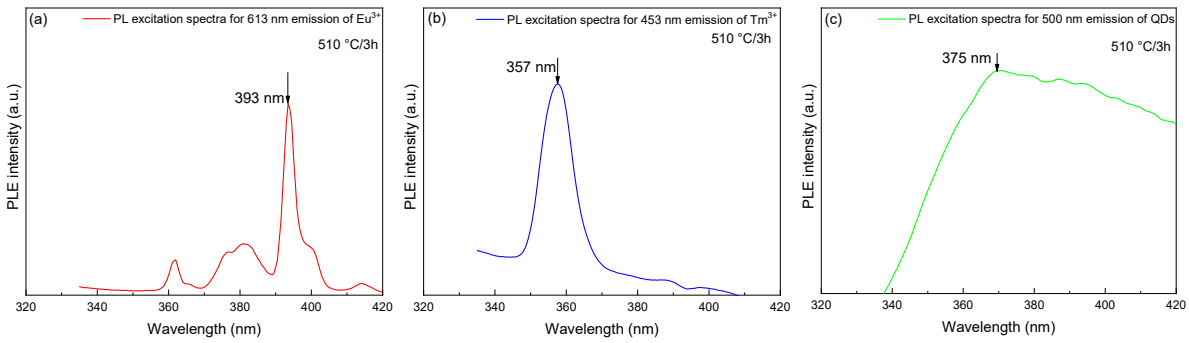

**Fig. S3.** PL excitation spectra of  $\text{Eu}^{3+}/\text{Tm}^{3+}$  co-doped  $\text{CsPbBr}_3$  QD GNCs heat-treated at 510 °C for 3h are recorded by monitoring the characteristic emission bands of  $\text{Eu}^{3+}$ ,  $\text{Tm}^{3+}$ , and  $\text{CsPbBr}_3$  QDs at (a) 613, (b) 453, and (c) 500 nm, respectively.

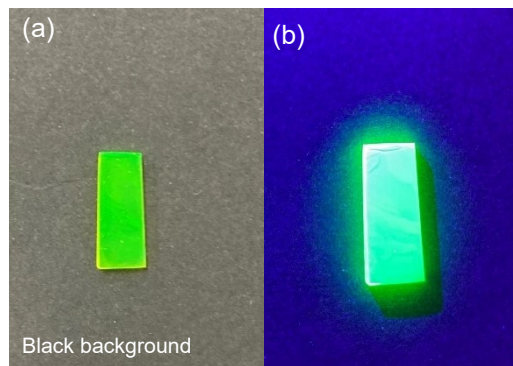

**Fig. S4.** Digital image of  $\text{Eu}^{3+}/\text{Tm}^{3+}$  co-doped  $\text{CsPbBr}_3$  QD GNCs heat-treated at  $500\text{ }^\circ\text{C}$  for 15h (a) under ambient light and (b) under 395 nm light.

**Note:** The photos provided in Fig. S4a are taken by placing the sample on a black background to reveal the excellent bright green emission even under ambient light.

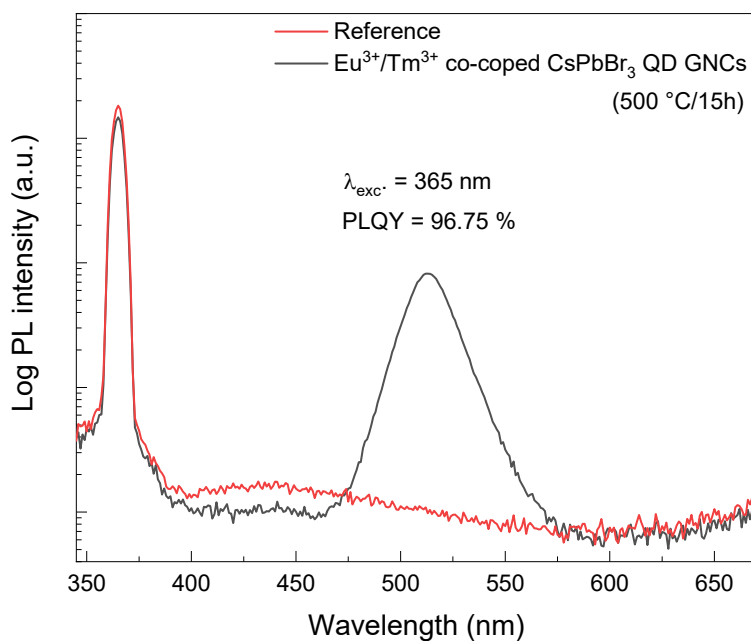

**Fig. S5.** PLQY spectra of the reference and  $\text{Eu}^{3+}/\text{Tm}^{3+}$  co-doped  $\text{CsPbBr}_3$  QD GNCs heat-treated at  $500\text{ }^\circ\text{C}$  for 15h.

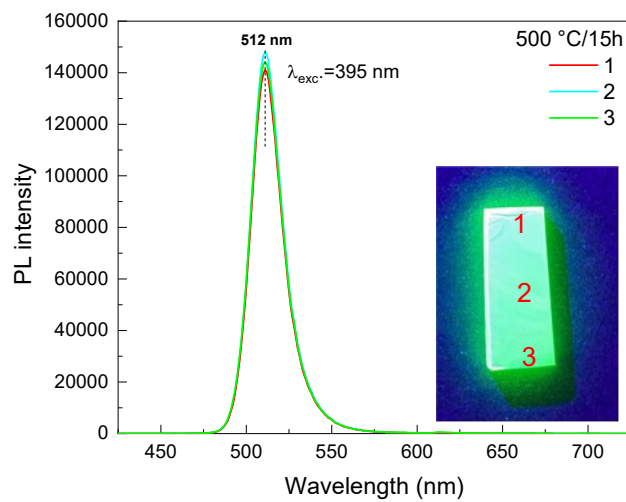

**Fig. S6.** PL spectra of  $\text{Eu}^{3+}/\text{Tm}^{3+}$  co-doped  $\text{CsPbBr}_3$  QD GNC heat-treated at 500 °C for 15h taken from different parts of the sample. The measured parts are marked on the macro photo provided as an inset.

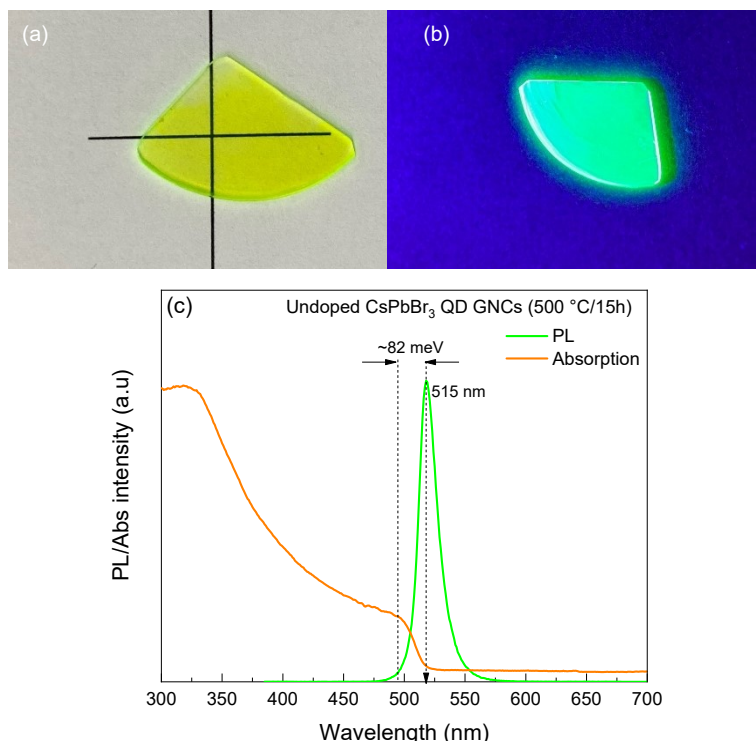

**Fig. S7.** Digital images of undoped CsPbBr<sub>3</sub> QD GNCs heat-treated at 500 °C for 15h (a) under ambient light, (b) under 395 nm light and (c) absorption and PL spectra ( $\lambda_{\text{exc}} = 365$  nm).

**Note:** PL spectra of undoped CsPbBr<sub>3</sub> QD GNCs display a narrow emission band located at ~515 nm with FWHM of 22 nm. Stokes shift and band gap are calculated as 82 meV and 2.46 eV, respectively.

**Table S1.** Nominal and final chemical composition of as-cast sample

|                                   |                        |                                    |            |            |                                   |             |                         |                        |                                    |                                    |
|-----------------------------------|------------------------|------------------------------------|------------|------------|-----------------------------------|-------------|-------------------------|------------------------|------------------------------------|------------------------------------|
| <b>Nominal composition (mol%)</b> | <b>SiO<sub>2</sub></b> | <b>Al<sub>2</sub>O<sub>3</sub></b> | <b>ZnO</b> | <b>CaO</b> | <b>B<sub>2</sub>O<sub>3</sub></b> | <b>NaBr</b> | <b>PbBr<sub>2</sub></b> | <b>Cs<sub>2</sub>O</b> | <b>Tm<sub>2</sub>O<sub>3</sub></b> | <b>Eu<sub>2</sub>O<sub>3</sub></b> |
|                                   | 33.75                  | 2                                  | 12         | 5          | 3                                 | 6           | 3                       | 7                      | 0.5                                | 0.75                               |
| <b>Nominal composition (wt%)</b>  | <b>Si</b>              | <b>Al</b>                          | <b>Zn</b>  | <b>Ca</b>  | <b>B</b>                          | <b>Na</b>   | <b>Pb</b>               | <b>Cs</b>              | <b>Tm</b>                          | <b>Eu</b>                          |
|                                   | 16.608                 | 1.891                              | 13.749     | 3.512      | 11.366                            | 2.417       | 10.894                  | 32.608                 | 2.961                              | 3.995                              |
| <b>Final composition (wt%)</b>    | <b>Si</b>              | <b>Al</b>                          | <b>Zn</b>  | <b>Ca</b>  | <b>B</b>                          | <b>Na</b>   | <b>Pb</b>               | <b>Cs</b>              | <b>Tm</b>                          | <b>Eu</b>                          |
|                                   | 18.456                 | 2.0126                             | 12.978     | 3.034      | 10.894                            | 2.161       | 11.104                  | 33.452                 | 2.563                              | 3.346                              |

**Note:** The comparison of nominal and final compositions reveal that the composition of glasses slightly changes during melting process in open crucibles due to evaporation of volatile components. However, no significant deviation from batch composition is detected.

**Table S2.** CIE color coordinates of samples excited with changing excitation wavelengths.

| As-cast sample             |        |        |
|----------------------------|--------|--------|
| Excitation Wavelength (nm) | CIE-x  | CIE-y  |
| 355 nm                     | 0.1828 | 0.1126 |
| 365 nm                     | 0.3036 | 0.1954 |
| 375 nm                     | 0.5651 | 0.3280 |
| 385 nm                     | 0.6075 | 0.3418 |
| 395 nm                     | 0.6431 | 0.3491 |
| 500 °C/2h                  |        |        |
| Excitation Wavelength (nm) | CIE-x  | CIE-y  |
| 355 nm                     | 0.1592 | 0.1051 |
| 365 nm                     | 0.2759 | 0.2009 |
| 375 nm                     | 0.5294 | 0.3160 |
| 385 nm                     | 0.5767 | 0.3292 |
| 395 nm                     | 0.6365 | 0.3442 |
| 500 °C/3h                  |        |        |
| Excitation Wavelength (nm) | CIE-x  | CIE-y  |
| 355 nm                     | 0.1676 | 0.1629 |
| 365 nm                     | 0.2414 | 0.2229 |
| 375 nm                     | 0.3943 | 0.2779 |
| 385 nm                     | 0.4197 | 0.2902 |
| 395 nm                     | 0.5643 | 0.3279 |
| 500 °C/4h                  |        |        |
| Excitation Wavelength (nm) | CIE-x  | CIE-y  |
| 355 nm                     | 0.1124 | 0.2173 |
| 365 nm                     | 0.1123 | 0.2320 |
| 375 nm                     | 0.1340 | 0.2444 |
| 385 nm                     | 0.1522 | 0.2497 |
| 395 nm                     | 0.2128 | 0.2712 |
| 500 °C/5h                  |        |        |
| Excitation Wavelength (nm) | CIE-x  | CIE-y  |
| 355 nm                     | 0.0838 | 0.4225 |
| 365 nm                     | 0.0846 | 0.4360 |
| 375 nm                     | 0.1062 | 0.4386 |
| 385 nm                     | 0.1217 | 0.4443 |
| 395 nm                     | 0.1719 | 0.4354 |
| 500 °C/15h                 |        |        |
| Excitation Wavelength (nm) | CIE-x  | CIE-y  |
| 355 nm                     | 0.0829 | 0.7386 |
| 365 nm                     | 0.0830 | 0.7384 |
| 375 nm                     | 0.0832 | 0.7371 |
| 385 nm                     | 0.0833 | 0.7363 |
| 395 nm                     | 0.0842 | 0.7343 |
| 510 °C/3h                  |        |        |
| Excitation Wavelength (nm) | CIE-x  | CIE-y  |
| 355 nm                     | 0.1745 | 0.3464 |
| 365 nm                     | 0.2322 | 0.3464 |
| 375 nm                     | 0.3840 | 0.3543 |
| 385 nm                     | 0.3920 | 0.3519 |
| 395 nm                     | 0.5536 | 0.3507 |



**Table S3.** CCT, CRI and CIE color coordinate values of some recent studies on Eu<sup>3+</sup>-doped CsPbBr<sub>3</sub> QD GNCs for solid-state-lighting.

| Eu <sup>3+</sup> doped CsPbBr <sub>3</sub> QD GNCs | Chromaticity Coordinates (x, y) | CCT (K)   | CRI (R <sub>a</sub> ) | Excitation wavelength (nm) | Reference |
|----------------------------------------------------|---------------------------------|-----------|-----------------------|----------------------------|-----------|
| Eu <sup>3+</sup> /Tb <sup>3+</sup> co-doped        | 0.3335, 0.3413                  | 4945      | 85.7                  | 460                        | 1         |
| Eu <sup>3+</sup> -doped                            | 0.4103, 0.4215                  | 9413-2403 | 11-42.5               | 365                        | 2         |
| Eu <sup>3+</sup> -doped                            | 0.384, 0.404                    | 4075      | 34.3-88.9             | 365-395                    | 3         |
| Eu <sup>3+</sup> -doped                            | 0.384, 0.404                    | 5656-7931 | 60.9-92.4             | 365                        | 4         |
| Eu <sup>3+</sup> /Tm <sup>3+</sup> co-doped        | 0.3840, 0.3543                  | 3692      | 30.7                  | 375                        | This work |

## References

1. Y. Cheng, C. Shen, L. Shen, W. Xiang and X. Liang, *ACS Appl. Mater. Interfaces*, 2018, **10**, 21434-21444.
2. R. Yuan, L. Shen, C. Shen, J. Liu, L. Zhou, W. Xiang and X. Liang, *Chem. Commun.*, 2018, **54**, 3395-3398.
3. P. Li, Y. Duan, Y. Lu, A. Xiao, Z. Zeng, S. Xu and J. Zhang, *Nanoscale*, 2020, **12**, 6630-6636.
4. R. Yuan, J. Liu, H. Zhang, Z. Zhang, G. Shao, X. Liang and W. Xiang, *J. Am. Ceram. Soc.*, 2018, **101**, 4927-4932.
